RESEARCH ARTICLE

# Capacity Estimation Model for Signalized Intersections under the Impact of Access Point

Jing Zhao<sup>1\*</sup>, Peng Li<sup>2</sup>, Xizhao Zhou<sup>1,3</sup>

**1** Department of Transportation Engineering, University of Shanghai for Science and Technology, Shanghai, P.R. China, **2** Department of Civil Engineering and Mechanics, University of Wisconsin at Milwaukee, Milwaukee, Wisconsin, United States of America, **3** School of Economics and Management, Shanghai Maritime University, Shanghai, P.R. China

\* [jing\\_zhao\\_traffic@163.com](mailto:jing_zhao_traffic@163.com)

## Abstract

Highway Capacity Manual 2010 provides various factors to adjust the base saturation flow rate for the capacity analysis of signalized intersections. No factors, however, is considered for the potential change of signalized intersections capacity caused by the access point closeing to the signalized intersection. This paper presented a theoretical model to estimate the lane group capacity at signalized intersections with the consideration of the effects of access points. Two scenarios of access point locations, upstream or downstream of the signalized intersection, and impacts of six types of access traffic flow are taken into account. The proposed capacity model was validated based on VISSIM simulation. Results of extensive numerical analysis reveal the substantial impact of access point on the capacity, which has an inverse correlation with both the number of major street lanes and the distance between the intersection and access point. Moreover, among the six types of access traffic flows, the access traffic flow 1 (right-turning traffic from major street), flow 4 (left-turning traffic from access point), and flow 5 (left-turning traffic from major street) cause a more significant effect on lane group capacity than others. Some guidance on the mitigation of the negative effect is provided for practitioners.

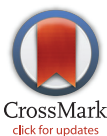

## OPEN ACCESS

**Citation:** Zhao J, Li P, Zhou X (2016) Capacity Estimation Model for Signalized Intersections under the Impact of Access Point. PLoS ONE 11(1): e0145989. doi:10.1371/journal.pone.0145989

**Editor:** Tiejiao Tang, Beihang University, CHINA

**Received:** August 23, 2015

**Accepted:** December 12, 2015

**Published:** January 4, 2016

**Copyright:** © 2016 Zhao et al. This is an open access article distributed under the terms of the [Creative Commons Attribution License](https://creativecommons.org/licenses/by/4.0/), which permits unrestricted use, distribution, and reproduction in any medium, provided the original author and source are credited.

**Data Availability Statement:** All relevant data are within the paper and its Supporting Information files.

**Funding:** This work received support from the Science and Technology Commission of (<http://www.stcsm.gov.cn/>, grant number 13510501700, XZ).

**Competing Interests:** The authors have declared that no competing interests exist.

## Introduction

The access points affect traffic operations and safety by introducing conflicts and friction into the traffic stream [1]. It imposes a potential negative effect on signalized intersection capacity near signalized intersections.

Many previous works have been done to establish the adjustment factors of signalized intersection capacity, which is an important input for intersection optimization and signal timing [2–5]. In HCM2010 [6], the adjustment factors include lane width, heavy vehicles, grade, parking, bus blockage, area type, lane utilization, right turns, left turns, and pedestrians and bicycles. Other adjustment factors are also discussed, such as short-lane [7–9], weather condition

[10], driving behavior [11–15], light condition [16], upstream weaving segment [17], adaptive cruise control system [18–21], advanced traveler information system [22–24], and advanced traffic management system [25, 26]. The change of the capacity is the result of car-following behavior. Extensive car-following models have been established including the consideration of factors to analyze the performance of the traffic system under different operation conditions. Those factors are geometric conditions [27–29], wrong way travel [30], shock wave [31], traffic flow stability [32], lateral separation [33], inter-vehicle communication [34, 35], electric vehicles [36], driver anticipation [37–40], optimal current difference, and anticipation optimal velocity. They are used to analysis the performance of the traffic system under different operation conditions [41–45].

Access management becomes one of the emerging themes in traffic engineering in recent years [46, 47]. Access management programs can smooth vehicle flow, reduce delay, and lead to fewer crashes. Technical constraints as well as political and institutional issues (e.g. the limits of land use, the width of the median and the density of road network), however, have limited widespread implementation, particularly in the developing countries. If it is not well addressed, the access point will be a potential effect factor to the capacity of signalized intersection. The previous research on the operational effects of access points mainly focused on the delays to drivers traveling along an arterial street segment and the capacity of access point itself based on the procedures for analyzing un-signalized intersections [48–50].

Although much is known about the operation of signalized intersections and the access point, little or no research has been conducted on the effect of access point on signalized intersection capacity to date. Even it was not considered as one of the adjustment factors in any of the capacity manuals. But if there is an access point near the signalized intersection, the demand starvation or queue spillback problem would be periodic and predictable.

In comparison with previous studies and applications, this paper:

1. Present a theoretical model for estimating the lane group capacity at signalized intersections with the consideration of the effects of access points.
2. Validate the proposed capacity model based on VISSIM simulation.
3. Provide practical guidance on the mitigation of the access point effect based on extensive numerical analyses.

The rest of the paper is organized as follows. Section 2 describes the framework of the computational procedure and the notation adopted in this paper. Section 3 discusses the traffic flow composition of an access point and the model of determining maximum throughput of the access point. Section 4 provides the formulations of the lane group capacity with the effect of access point. The proposed model is validated in Section 5. The effect of six types of access flow on the capacity of signalized intersection is analyzed based on numerical test in Section 6. Conclusions and recommendations are given at the end.

## Model Configuration

Two scenarios of access point location are discussed in this paper as shown in Figs 1 and 2, respectively. The scenarios 1 is that the access point locates at upstream of the intersection. And the scenarios 2 is that the access point locates at downstream of the intersection. Wherever its location, the access point is a potential blockage. The paper discusses the traffic flow composition of an access point and the maximum through traffic flow rate at the access point ( $s_2$ ), firstly. Then the calculation model of the lane group capacity with the impacts of upstream and

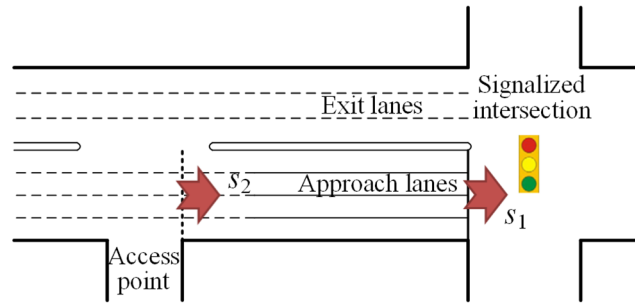

**Fig 1. Scenario 1: Access point at upstream of intersection.**

doi:10.1371/journal.pone.0145989.g001

downstream access point is established, respectively. The outline of computational procedure is shown in Fig 3.

To facilitate model presentation, notations used hereafter are summarized in Table 1.

### Model Formulation

#### Maximum throughput of the access point

As illustrated in Fig 4, there are six types of access traffics. Their impacts on the maximum throughput are different, as shown in Fig 5. Eq 1 is used to compute the through traffic flow rate at the access point. The adjustment factors are described in the following subparts.

$$s_2 = s_0 N f_1 f_2 f_3 f_4 f_5 f_6 \tag{1}$$

**Adjustment for access traffic flow (1).** As illustrated in Fig 5(a), the access traffic flow (1) (right turn vehicles) often slow the following through vehicles when they enter into the access connection from the major street. So it will make the through traffic flow rate decrease, which can be illustrated as Eq 2. The proportion of right-turns and the decrease of saturation flow rate cause by right-turns are considered. The factor, 0.15, is based on the right turn adjustment formulation in HCM2010 [6].

$$f_1 = 1.0 - 0.15 \frac{q_{A1}}{q_M} - \frac{q_{A1}}{q_M} \tag{2}$$

**Adjustment for access traffic flow (2).** As Fig 5(b) illustrated, the access traffic flow (2) is allowed to enter the outside lane of the major street when an accepted gap occurs. It will cause

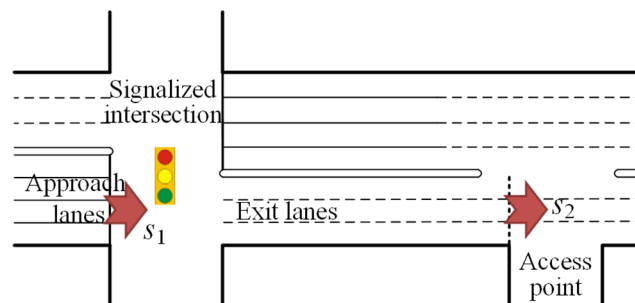

**Fig 2. Scenario 2: Access point at downstream of intersection.**

doi:10.1371/journal.pone.0145989.g002

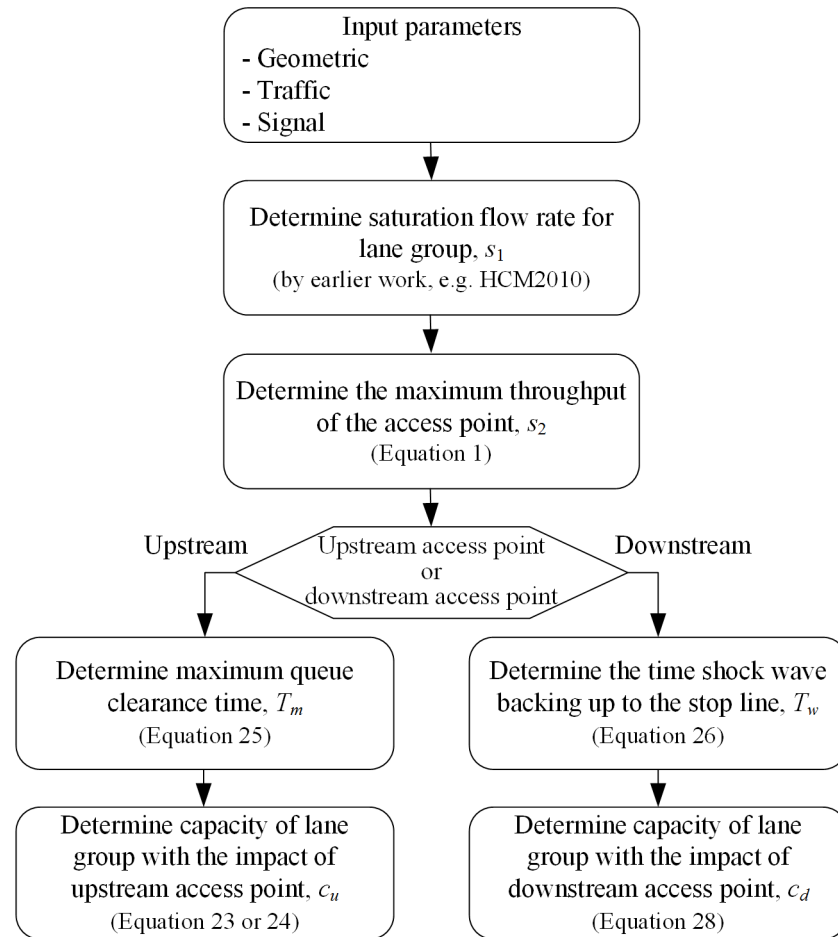

**Fig 3. Outline of computational procedure.**

doi:10.1371/journal.pone.0145989.g003

the time loss of following through traffic when driving into the outside lane. The operation process of through traffic on a major street and the access traffic flow (2) is somewhat similar with the operation of traffic-actuated intersections [51]. Along the same lines as the capacity estimating model of traffic-actuated intersections, the adjustment factor for the access traffic flow (2) is calculated by Eq 3.

$$f_2 = \frac{N - 1 + \frac{G_{02} + \frac{s_{A2}}{s_{02}} G_{A2}}{G_{02} + G_{A2}}}{N} \quad (3)$$

$$G_{02} = G_{0s2} + G_{0e2} \quad (4)$$

$$G_{0s2} = \frac{q_{02} G_{A2}}{s_0 - q_{02}} \quad (5)$$

$$G_{A2} = \frac{q_{A2} G_{02}}{s_{A2} - q_{A2}} \quad (6)$$

**Table 1. Notation of key model parameters and variables.**

|             |                                                                                               |
|-------------|-----------------------------------------------------------------------------------------------|
| $c_u$       | capacity of lane group with the impact of upstream access point (veh/h)                       |
| $c_d$       | capacity of lane group with the impact of downstream access point (veh/h)                     |
| $C$         | cycle length (s)                                                                              |
| $f_i$       | adjustment factor for the access traffic flow $i$                                             |
| $g_e$       | effective green time for the lane group (s)                                                   |
| $G_{0i}$    | effective movement time of major street for access traffic flow $i$ (s)                       |
| $G_{0ei}$   | green extension time of major street for access traffic flow $i$ (s)                          |
| $G_{0si}$   | service time of major street under saturation flow rate for access traffic flow $i$ (s)       |
| $G_{Ai}$    | effective movement time for access traffic flow $i$ (s)                                       |
| $h_d$       | average space headway of stopped vehicle (m/veh)                                              |
| $k_j$       | jam density (veh/m/ln)                                                                        |
| $k_s$       | density of the saturation traffic flow (veh/m/ln)                                             |
| $L$         | distance between access point and stop line (m)                                               |
| $N$         | number of lanes                                                                               |
| $N_0$       | average number of waiting vehicles (veh)                                                      |
| $N_B$       | number of blocked lanes                                                                       |
| $p(n)$      | probability of the queue vehicle number = $n$                                                 |
| $q_{02}$    | arrival rate of the outside lane of major street (veh/s)                                      |
| $q_{04}$    | arrival rate of the inside lane of the opposing major street (veh/s)                          |
| $q_{06}$    | arrival rate of the inside lane of major street (veh/s)                                       |
| $q_{Ai}$    | arrival rate of the access traffic $i$ (veh/s)                                                |
| $q_{A,max}$ | maximal traffic flow (capacity) of the access traffic (veh/s)                                 |
| $q_M$       | arrival rate of all lanes of major street (veh/s)                                             |
| $q_{OM}$    | arrival rate of the opposing major street (veh/s)                                             |
| $r_e$       | effective red time for the lane group (s)                                                     |
| $s_0$       | base saturation flow rate per lane (veh/h/ln)                                                 |
| $s_1$       | saturation flow rate for subject lane group without the consideration of access point (veh/h) |
| $s_2$       | maximum throughput of the access point (veh/h)                                                |
| $s_{Ai}$    | saturation flow rate for access traffic $i$ (veh/s)                                           |
| $t_c$       | critical time headways (s)                                                                    |
| $t_f$       | move-up time (s)                                                                              |
| $T_m$       | maximum queue clearance time (s)                                                              |
| $T_w$       | the length of time shock wave backing up to the stop line (s)                                 |
| $u_w$       | speed of the shock wave (m/s)                                                                 |
| $W_m$       | width of the median (m)                                                                       |
| $\Delta$    | minimum arrival headway (s)                                                                   |
| $\phi$      | proportion of free (un-bunched) vehicles                                                      |

doi:10.1371/journal.pone.0145989.t001

$$G_{0e2} = \frac{e^{\frac{\phi q_{02}}{1-\Delta q_{02}}(t_c - \Delta)}}{\phi q_{02}} - \frac{1 - \Delta q_{02}}{\phi q_{02}} \quad (7)$$

**Adjustment for access traffic flow (3).** The impact of access traffic flow (3) is that a part of time in which the conflict zone is occupied by it. So the proportion of time which is used by the through traffic should be determined. The operation principal of through traffic and the access traffic flow (3) at the conflict zone is similar to that of access traffic flow (2). The

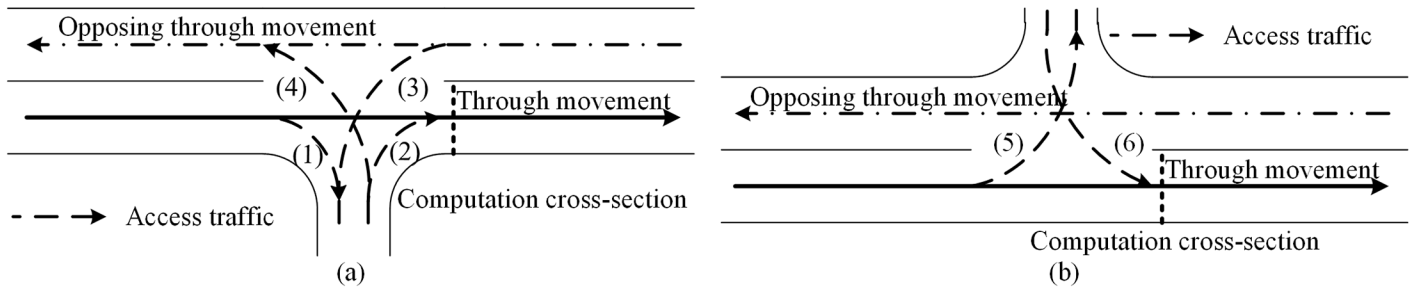

**Fig 4. Composition of access point traffic flows.** (a) Access point at right side of the road. (b) Access point at left side of the road.

doi:10.1371/journal.pone.0145989.g004

difference is, in this case, all lanes of the through traffic are impacted by access traffic flow (3), as illustrated in Fig 5(c).

$$f_3 = \frac{G_{03}}{G_{03} + G_{A3}} \tag{8}$$

$$G_{03} = G_{0s3} + G_{0e3} \tag{9}$$

$$G_{0s3} = \frac{q_M G_{A3}}{s_0 - q_M} \tag{10}$$

$$G_{A3} = \frac{q_{A3} G_{03}}{s_{A3} - q_{A3}} \tag{11}$$

$$G_{0e3} = \frac{e^{\frac{\varphi q_M}{1-\Delta q_M}(t_c-\Delta)}}{\varphi q_M} - \frac{1-\Delta q_M}{\varphi q_M} \tag{12}$$

**Adjustment for access traffic flow (4).** As Fig 5(d) illustrated, the access traffic flow (4) has to cross the through traffic and merge into the inside lane of the opposing through traffic. If the median of the street is not wide enough, the through traffic of the major street is blocked by the access traffic flow (4) when it is waiting for the gap acceptance of the opposing through traffic. It can be illustrated by Eq 13, in which the average number of waiting vehicles is calculated based on the average queue length formulation at un-signalized intersections [52], as shown in Eq 14. The number of blocked lanes is related with the width of the median, as Eq 15 illustrated.

$$f_4 = 1 - \frac{N_0 N_B}{N} \tag{13}$$

$$N_0 = \frac{\left(\frac{q_{A4}}{q_{A,max}}\right)^{\frac{1}{1+0.45\frac{t_c-t_f}{t_f}q_{04}}}}{1 - \left(\frac{q_{A4}}{q_{A,max}}\right)^{\frac{1}{1+0.45\frac{t_c-t_f}{t_f}q_{04}} - \frac{1.51}{1+0.68\frac{t_c-t_f}{t_f}q_{04}}}} \tag{14}$$

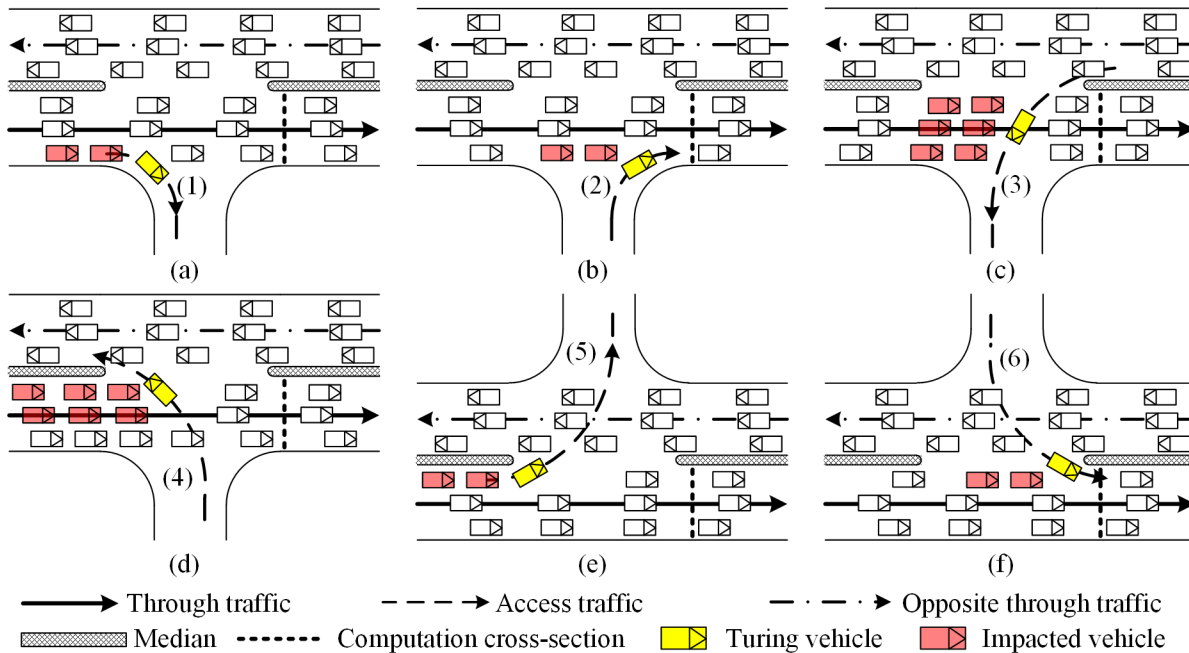

**Fig 5. Impacts of access point traffic flows on the through traffic.** (a) Access traffic flow (1). (b) Access traffic flow (2). (c) Access traffic flow (3). (d) Access traffic flow (4). (e) Access traffic flow (5). (f) Access traffic flow (6).

doi:10.1371/journal.pone.0145989.g005

$$N_B = \begin{cases} 0, & W_m \geq 5 \\ 1, 2 & \leq W_m < 5 \\ 2, 0 & < W_m < 2 \end{cases} \quad (15)$$

**Adjustment for access traffic flow (5).** As Fig 5(e) illustrated, the access traffic flow (5) cannot across opposing through traffic until accepted gap occurs. During the waiting time, it will impact the following through traffic flow. So the waiting time of left turn vehicles should be taken into consideration, which can be specified as Eq 16. The probability of no waiting vehicle can be calculated based on the queue length probability model at un-signalized intersections [52], as shown in Eq 17.

$$f_5 = 1 - \frac{p(n \neq 0)}{N} \quad (16)$$

$$p(n \neq 0) = \left( \frac{q_{A5}}{q_{A5,max}} \right)^{\frac{1}{1+0.45 \frac{f_c - f}{f} q_{OM}}} \quad (17)$$

**Adjustment for access traffic flow (6).** As Fig 5(f) illustrated, the access traffic flow (6) is allowed to enter the inside lane of the major street when an accepted gap occurs, so that it will cause the time loss of the following through traffic, which is similar to that of access traffic flow (2). Along the same lines as the adjustment factor estimating model of access traffic flow (2),

the adjustment factor for the access traffic flow (6) is calculated by Eq 18.

$$f_6 = \frac{N - 1 + \frac{G_{06} + \frac{s_{A6} G_{A6}}{s_{06}}}{G_{06} + G_{A6}}}{N} \tag{18}$$

$$G_{06} = G_{0s6} + G_{0e6} \tag{19}$$

$$G_{0s6} = \frac{q_{06} G_{A6}}{s_0 - q_{06}} \tag{20}$$

$$G_{A6} = \frac{q_{A6} G_{06}}{s_{A6} - q_{A6}} \tag{21}$$

$$G_{0e6} = \frac{e^{\lambda(t_c - \Delta)}}{\varphi q_{06}} - \frac{1 - \Delta q_{06}}{\varphi q_{06}} \tag{22}$$

### Capacity with the impact of upstream access point

The upstream access point would cause a negative effect on approach capacity by the potential impact of upstream blockage. For example, when the input volume of the approach is limited by the upstream access point, the lane group capacity couldn't be larger than the through traffic flow rate of the access point. The influence extent is related to the effective green time ( $g_e$ ) and the maximum queue clearance time ( $T_m$ ), which can be divided into two different situations, as shown in Fig 6.

As illustrated in Fig 6(a), when the effective green time is shorter than the maximum queue clearance time ( $g_e \leq T_m$ ), the flow rate of the lane group is equal to the ideal saturation flow rate ( $s_1$ ), during all effective green time and the upstream access point has no effect on the lane group capacity. The capacity of a given lane group may be stated as shown in Eq 23.

$$c_u = s_1 \frac{g_e}{C}, \quad (g_e \leq T_m) \tag{23}$$

As illustrated in Fig 6(b), when the effective green time is longer than the maximum queue clearance time ( $g_e > T_m$ ), the flow rate of the lane group is equal to the ideal saturation flow

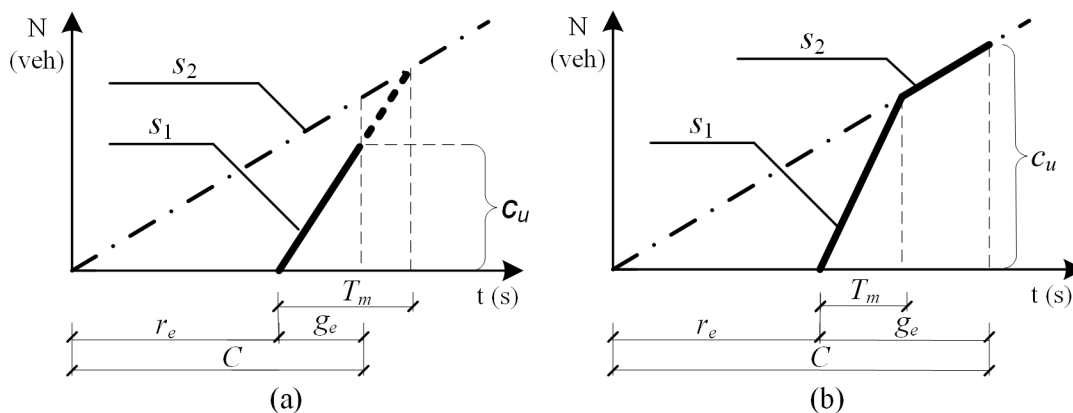

**Fig 6. Queue accumulation polygons illustrating the effect of upstream access point. (a) Saturation 1:  $g_e \leq T_m$ . (b) Saturation 2:  $g_e > T_m$ .**

doi:10.1371/journal.pone.0145989.g006



rate ( $s_1$ ) during the maximum queue clearance time, and it is equal to the ideal arrival rate of the approach ( $s_2$ ) during the rest of the effective green time. The capacity of a given lane group may be stated as shown in Eq 24.

$$c_u = s_1 \frac{T_m}{C} + s_2 \frac{g_e - T_m}{C}, \quad (g_e > T_m) \tag{24}$$

For a given signal timing, the maximum queue clearance time is computed using Eq 25. If the distance between an access point and stop line is long enough, the queue length of the arrival vehicles would not overflow to the access point, then the maximum queue clearance time is equal to the time for clearing the maximum arrival vehicles during the effective red time. Contrarily, if it does cause queue blockages to the access point, the maximum queue clearance time is equal to the time for clearing the stopped vehicles between the access point and stop line.

$$T_m = \begin{cases} \frac{s_2 r_e}{s_1 - s_2}, & L \geq \frac{s_2 r_e h_d}{3600N} \\ \frac{3600LN}{s_1 h_d}, & L < \frac{s_2 r_e h_d}{3600N} \end{cases} \tag{25}$$

### Capacity with the impact of downstream access point

As illustrated in Fig 7, during the green time, traffic flow is going through the stop line with ideal saturation flow rate ( $s_1$ ). The departure rate of the receiving lanes is  $s_2$ , which equal to the maximum through traffic flow rate at the downstream access point. If ( $s_1 > s_2$ ), the access point can be considered as a traffic bottleneck at the downstream of the signalized intersection. The congestion will back up to the intersection, which greatly effects the operation of the approach [53]. The length of time shock wave backing up to the stop line can be determined based on shockwave dynamics theory [54], as Eqs 26 and 27 illustrated. Then, the capacity of a given lane group with the impact of downstream access point may be stated as shown in Eq 28.

$$T_w = \frac{L}{u_w} \tag{26}$$

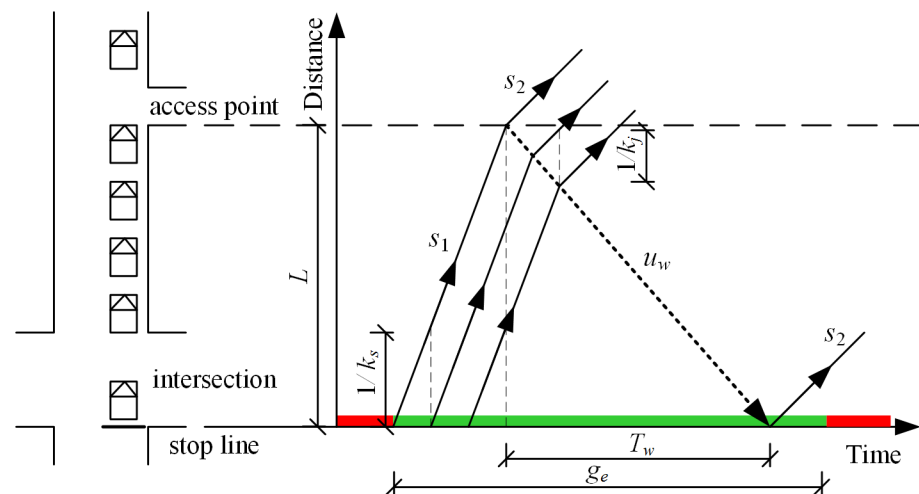

**Fig 7. Shockwave dynamics illustrating the effect of downstream access point.**

doi:10.1371/journal.pone.0145989.g007

$$u_w = \frac{s_1 - s_2}{3600(k_j - k_s)} \tag{27}$$

$$c_d = \begin{cases} s_1 \frac{g_e}{C}, g_e \leq T_w \\ s_1 \frac{T_w}{C} + s_2 \frac{g_e - T_w}{C}, g_e > T_w \end{cases} \tag{28}$$

### Model Validation

In this section, the proposed capacity model is validated based on VISSIM simulation. [Table 2](#) summarized the data inputs. Totally, 72 scenarios were tested. Model validation results are shown in [Table 3](#). As [Table 4](#) illustrated, the paired samples T-test shows that there was no significant difference between the capacity calculated by the proposed model and that obtained by the simulations ( $t = 1.100, P = 0.275 > 0.05$ ). Consequently, the accuracy of the proposed capacity estimation models is acceptable.

### Sensitivity Analysis

In this section, the effect of six types of access flow on the capacity of signalized intersection is evaluated based on numerical analysis. Cycle length was set to 120 s in all cases. Effective green time and red time for the lane group were set to 32 s and 88 s, respectively. Average space headway of stopped vehicle was set to 7 m. Arrival rate of each lane on major street was set to 300 veh/h/ln. Arrival rate of the access traffic was set to 100 veh/h. Jam density was set to 0.125 veh/m/ln. Density of the saturation traffic flow was set to 0.1 veh/m/ln. Base saturation flow rate per lane for major street was set to 1800 veh/h/ln. Lane group saturation flow rate for subject without the consideration of access point was set to 1650 veh/h/ln. Saturation flow rate for access traffic was set to 900 veh/h/ln. Critical time headways was set to 7.5 s. Move-up time was set to 4 s. Minimum arrival headway was set to 1.5 s. Proportion of free vehicles was set to 0.844. Width of the median was set to 0 m.

[Fig 8](#) shows the analysis results, which includes six sub-pictures. In this Figure, the two columns respect the upstream access point situation (the left column) and downstream access

**Table 2. Model validation cases.**

| Input data                                              | Number of cases | Value                                                                                                                                                                        |
|---------------------------------------------------------|-----------------|------------------------------------------------------------------------------------------------------------------------------------------------------------------------------|
| Location of the access point                            | 4               | Case 1: upstream + right side of the road, Case 2: upstream + left side of the road, Case 3: downstream + right side of the road, Case 4: downstream + left side of the road |
| Number of lanes                                         | 3               | 1, 2, 3                                                                                                                                                                      |
| Distance between access point and stop line (m)         | 6               | 50, 60, 70, 80, 90, 100                                                                                                                                                      |
| Cycle length (s)                                        | 1               | 120                                                                                                                                                                          |
| Effective green time (s)                                | 1               | 32                                                                                                                                                                           |
| Effective red time (s)                                  | 1               | 88                                                                                                                                                                           |
| Flow rate ratio between major street and access traffic | 1               | 3:1                                                                                                                                                                          |

doi:10.1371/journal.pone.0145989.t002

**Table 3. Model validation results.**

| Location of the access point      | N | L   | Model calculation results (veh/h) | VISSIM simulation results (veh/h) | Location of the access point        | N   | L    | Model calculation results (veh/h) | VISSIM simulation results (veh/h) |
|-----------------------------------|---|-----|-----------------------------------|-----------------------------------|-------------------------------------|-----|------|-----------------------------------|-----------------------------------|
| upstream + right side of the road | 1 | 50  | 1166                              | 1103                              | downstream + right side of the road | 1   | 50   | 1351                              | 1248                              |
|                                   |   | 60  | 1277                              | 1237                              |                                     |     | 60   | 1517                              | 1406                              |
|                                   |   | 70  | 1406                              | 1525                              |                                     |     | 70   | 1684                              | 1821                              |
|                                   |   | 80  | 1573                              | 1713                              |                                     |     | 80   | 1813                              | 1678                              |
|                                   |   | 90  | 1665                              | 1787                              |                                     |     | 90   | 1832                              | 1912                              |
|                                   |   | 100 | 1795                              | 1823                              |                                     |     | 100  | 1850                              | 1864                              |
|                                   | 2 | 50  | 2886                              | 2743                              | 2                                   | 50  | 3367 | 3266                              |                                   |
|                                   |   | 60  | 2997                              | 2832                              |                                     | 60  | 3552 | 3468                              |                                   |
|                                   |   | 70  | 3145                              | 3002                              |                                     | 70  | 3663 | 3803                              |                                   |
|                                   |   | 80  | 3367                              | 3636                              |                                     | 80  | 3700 | 3725                              |                                   |
|                                   |   | 90  | 3478                              | 3674                              |                                     | 90  | 3700 | 3727                              |                                   |
|                                   |   | 100 | 3626                              | 3686                              |                                     | 100 | 3700 | 3727                              |                                   |
|                                   | 3 | 50  | 4773                              | 4558                              | 3                                   | 50  | 5384 | 5344                              |                                   |
|                                   |   | 60  | 4884                              | 4655                              |                                     | 60  | 5495 | 5453                              |                                   |
|                                   |   | 70  | 4995                              | 4734                              |                                     | 70  | 5550 | 5512                              |                                   |
|                                   |   | 80  | 5217                              | 5082                              |                                     | 80  | 5550 | 5509                              |                                   |
|                                   |   | 90  | 5328                              | 5444                              |                                     | 90  | 5550 | 5595                              |                                   |
|                                   |   | 100 | 5495                              | 5584                              |                                     | 100 | 5550 | 5593                              |                                   |
| upstream + left side of the road  | 1 | 50  | 1425                              | 1354                              | downstream + left side of the road  | 1   | 50   | 1462                              | 1356                              |
|                                   |   | 60  | 1499                              | 1442                              |                                     |     | 60   | 1573                              | 1483                              |
|                                   |   | 70  | 1591                              | 1645                              |                                     |     | 70   | 1684                              | 1695                              |
|                                   |   | 80  | 1684                              | 1637                              |                                     |     | 80   | 1813                              | 1737                              |
|                                   |   | 90  | 1739                              | 1805                              |                                     |     | 90   | 1832                              | 1840                              |
|                                   |   | 100 | 1813                              | 1840                              |                                     |     | 100  | 1850                              | 1872                              |
|                                   | 2 | 50  | 3256                              | 3117                              | 2                                   | 50  | 3441 | 3334                              |                                   |
|                                   |   | 60  | 3330                              | 3262                              |                                     | 60  | 3589 | 3495                              |                                   |
|                                   |   | 70  | 3404                              | 3547                              |                                     | 70  | 3663 | 3770                              |                                   |
|                                   |   | 80  | 3515                              | 3675                              |                                     | 80  | 3700 | 3729                              |                                   |
|                                   |   | 90  | 3589                              | 3727                              |                                     | 90  | 3700 | 3724                              |                                   |
|                                   |   | 100 | 3663                              | 3740                              |                                     | 100 | 3700 | 3731                              |                                   |
|                                   | 3 | 50  | 5106                              | 4939                              | 3                                   | 50  | 5439 | 5382                              |                                   |
|                                   |   | 60  | 5162                              | 4969                              |                                     | 60  | 5495 | 5398                              |                                   |
|                                   |   | 70  | 5273                              | 5038                              |                                     | 70  | 5550 | 5512                              |                                   |
|                                   |   | 80  | 5384                              | 5170                              |                                     | 80  | 5550 | 5508                              |                                   |
|                                   |   | 90  | 5439                              | 5590                              |                                     | 90  | 5550 | 5588                              |                                   |
|                                   |   | 100 | 5495                              | 5596                              |                                     | 100 | 5550 | 5591                              |                                   |

doi:10.1371/journal.pone.0145989.t003

**Table 4. Paired samples test.**

|                        | Paired Differences |                |                 |                                           |        | t     | df | Sig. (2-tailed) |
|------------------------|--------------------|----------------|-----------------|-------------------------------------------|--------|-------|----|-----------------|
|                        | Mean               | Std. Deviation | Std. Error Mean | 95% Confidence interval of the difference |        |       |    |                 |
|                        |                    |                |                 | Lower                                     | Upper  |       |    |                 |
| Pair: model—simulation | 14.875             | 114.725        | 13.520          | -12.084                                   | 41.834 | 1.100 | 71 | 0.275           |

doi:10.1371/journal.pone.0145989.t004

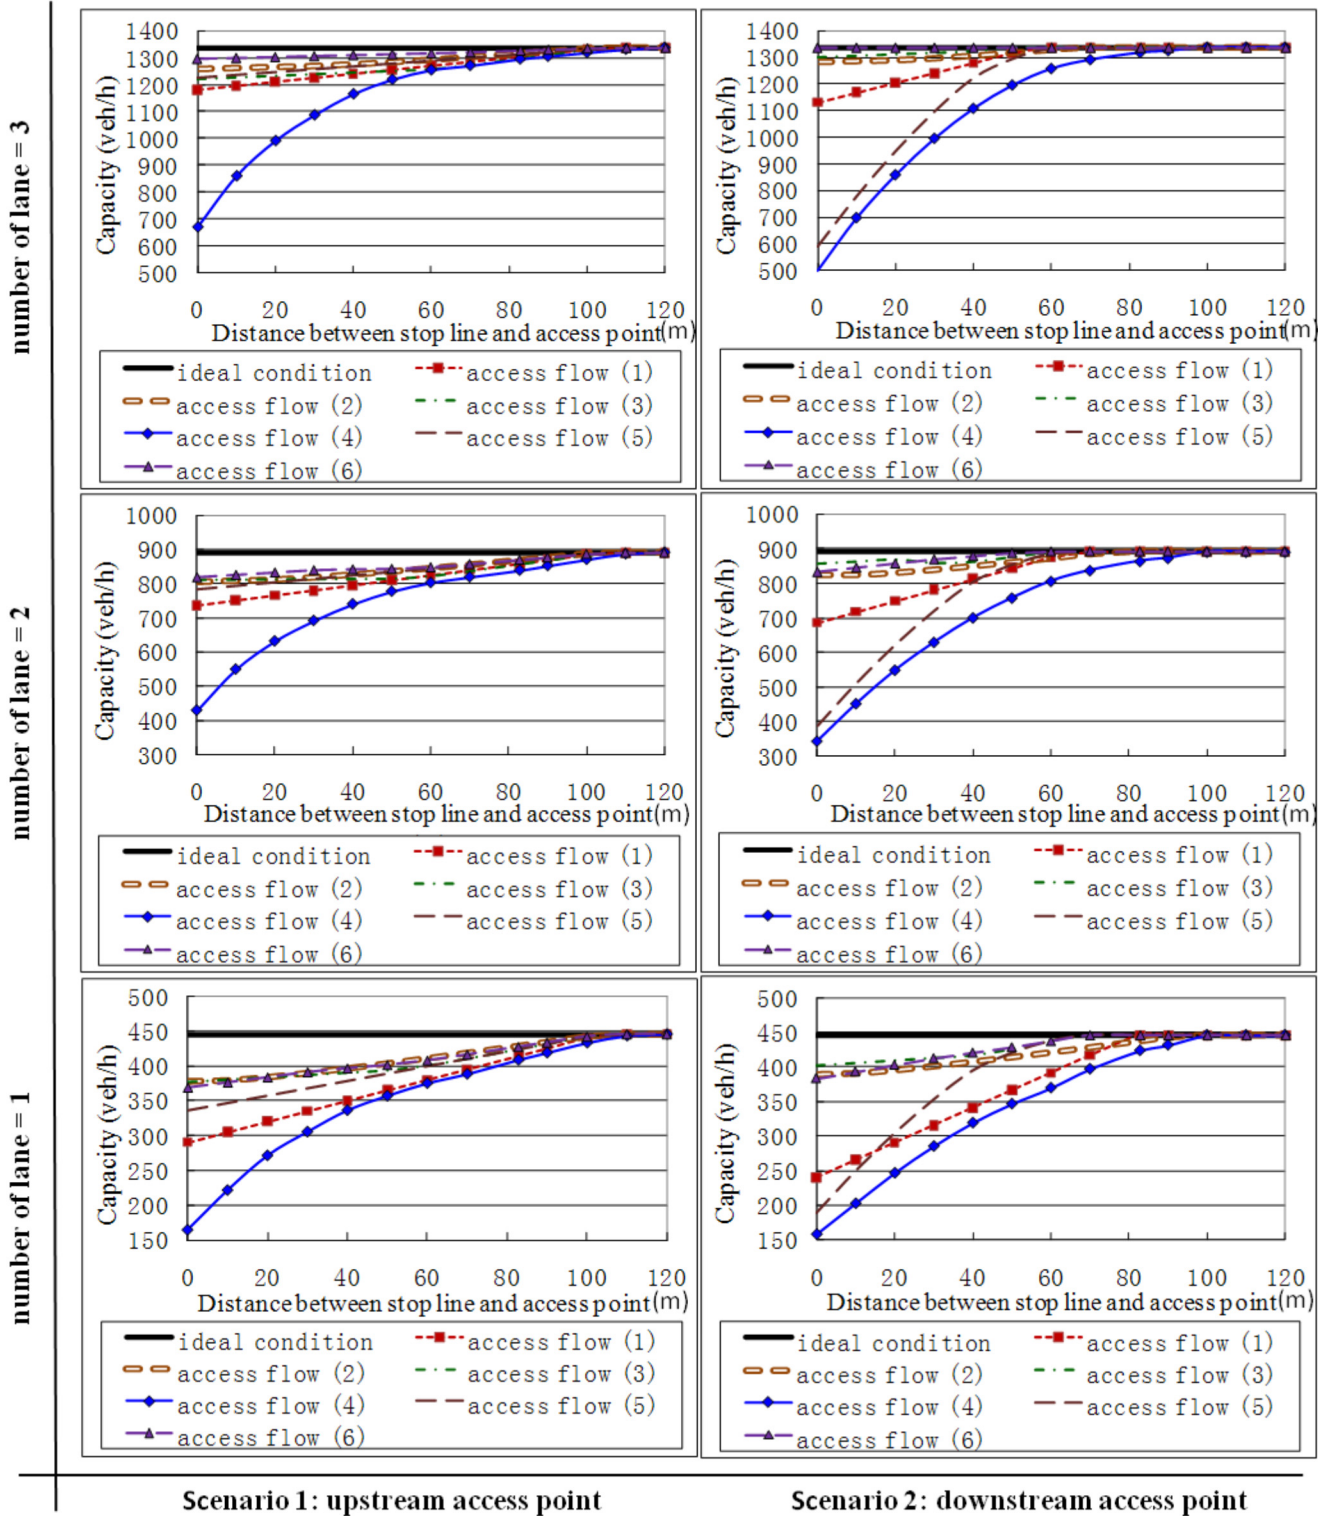

Fig 8. Comparison of capacities under the impact of different access traffic flows.

doi:10.1371/journal.pone.0145989.g008

point situation (the right column), respectively, and the number of major street lanes increases from bottom to top. For each sub-picture, the horizontal axis represents distance between stop line and access point, and the vertical coordinate is the lane group capacity of the intersection. The following observations could be made from [Fig 8](#).

1. Overall, capacity increases with the distance between stop line and access point. This increase has an asymptotic shape towards the capacity of ideal condition.
2. If the distance between the intersection and access point is long enough, the effect of access traffic flow could be ignored. For example, when the cycle length equals to 120 s and the green time ratio equals to 0.27, the access point locating more than 100 m upstream of the intersection or 90 m downstream of the intersection has no effect to the intersection capacity.
3. The column sub-pictures show an inverse correlation between the number of major street lanes and the negative impact of access points on the capacity. The negative impact of access points fade away, but could not be eliminated, with the increase of the number of lanes on major street.
4. The access traffic flow 1 (right-turning traffic from major street), flow 4 (left-turning traffic from access point), and flow 5 (left-turning traffic from major street) cause a significant effect on lane group capacity. Therefore, auxiliary turning lanes should be used to reduce the severity and duration of conflict between turning vehicles and through traffic, if the land use is permitted.

## Conclusions

A theoretical model for estimating the lane group capacity with the consideration of the effects of access points is developed. From extensive numerical analysis, the following conclusions can be drawn:

1. The access point reduces the capacity of the lane group when it is close to the signalized intersection. The influence extent is mainly related to the signal timing, the number of lanes, the distance between the intersection and access point, and the types of access flows.
2. The access flows have no effect on lane group capacity if only the effective green time is shorter than the maximum queue clearance time in the case of upstream access point, or the effective green time is shorter than the time shock wave backing up to the stop line in the case of downstream access point.
3. Overall, the larger the number of major street lanes or the longer distance between the intersection and access point the less the negative impact of access point on the capacity generates. If the distance between the intersection and access point is long enough, the effect of access traffic flow could be ignored. For example, when the cycle length equals to 120 s and the green time ratio equals to 0.27, the access point locating more than 100 m upstream of the intersection or 90 m downstream of the intersection has no effect to the intersection capacity.
4. The access traffic flow 1 (right-turning traffic from major street), flow 4 (left-turning traffic from access point), and flow 5 (left-turning traffic from major street) have a significant effect on lane group capacity. Auxiliary turning lanes could be used to reduce those effects if the land use is permitted.

Some factors in the model, such as critical time headways, move-up time, minimum arrival headway, proportion of free vehicles, are closely related with the driver behavior [55–58] and local traffic condition [59, 60]. For application in the practice, they should be calibrated for local traffic condition.

## Supporting Information

**S1 Table. Lane group capacity under the impact of access traffic flows.**  
(DOCX)

## Author Contributions

Conceived and designed the experiments: JZ. Performed the experiments: JZ. Analyzed the data: JZ XZ PL. Contributed reagents/materials/analysis tools: JZ XZ. Wrote the paper: JZ PL XZ.

## References

1. Papayannoulis V, Gluck JS, Feeney K, Levinson HS. Access spacing and traffic safety. Transportation Research Circular. 2000; E-C019: 1–15.
2. Chen Q. An Optimization Model for the Selection of Bus-Only Lanes in a City. PLoS ONE. 2015; 10(7): e0133951. doi: [10.1371/journal.pone.0133951](https://doi.org/10.1371/journal.pone.0133951) PMID: [26214001](https://pubmed.ncbi.nlm.nih.gov/26214001/)
3. Ng KM, Reaz M. An Integrated Approach for Platoon-based Simulation and Its Feasibility Assessment. PLoS ONE. 2015; 10(3): e0114406. doi: [10.1371/journal.pone.0114406](https://doi.org/10.1371/journal.pone.0114406) PMID: [25785693](https://pubmed.ncbi.nlm.nih.gov/25785693/)
4. Zhao J, Ma W, Zhang HM, Yang X. Increasing the Capacity of Signalized Intersections with Dynamic Use of Exit Lanes for Left-Turn Traffic. Transportation Research Record: Journal of the Transportation Research Board. 2013; 2355: 49–59.
5. Zhao J, Ma W, Zhang HM, Yang X. Two-Step Optimization Model for Dynamic Lane Assignment at Isolated Signalized Intersections. Transportation Research Record: Journal of the Transportation Research Board. 2013; 2355(1): 39–48.
6. TRB. Highway Capacity Manual 2010. Washington, DC: Transportation Research Board; 2010.
7. Tian ZZ, Wu N. Probabilistic Model for Signalized Intersection Capacity with a Short Right-Turn Lane. American Society of Civil Engineers. 2006; 132(3): 205–12.
8. Wu N. Total Approach Capacity at Signalized Intersections with Shared and Short Lanes: Generalized Model Based on a Simulation Study. Transportation Research Record: Journal of the Transportation Research Board. 2007; 2027: 19–26.
9. Zhao J, Yun M, Yang X. Capacity Model for Signalized Intersection under the Impact of Upstream Short Lane. Procedia-Social and Behavioral Sciences. 2013; 96(6): 1745–54.
10. Prevedouros PD, Chang K. Potential Effects of Wet Conditions on Signalized Intersection LOS. Journal of Transportation Engineering. 2005; 131(12): 898–903.
11. Rahman MM, Hasan T, Nakamura F. Development of Professional Driver Adjustment Factors for the Capacity Analysis of Signalized Intersections. Journal of Transportation Engineering. 2008; 134(12): 532–6.
12. Torbic D, Elefteriadou L. Effects of Driver Population on the Traffic Operational Performance of Signalized Intersections. Transportation Research Circular. 2000; E-C018: 336–47.
13. Tang TQ, Li P, Yang XB. An extended macro model for traffic flow with consideration of multi static bottlenecks. Physica A: Statistical Mechanics And Its Applications. 2013; 392(17): 3537–45.
14. Tang TQ, Li P, Wu YH, Huang HJ. A Macro Model for Traffic Flow with Consideration of Static Bottleneck. Communications In Theoretical Physics. 2012; 58(2): 300–6.
15. Tang TQ, Huang HJ, Shang HY. Influences of the driver's bounded rationality on micro driving behavior, fuel consumption and emissions. Transportation Research Part D: Transport and Environment. 2015; 41: 423–32.
16. Burrow IJ. The Effect of Darkness on the Capacity of Road Junctions. Traffic Engineering & Control. 1986; 27(12): 597–600.

17. Yang XG, Zhao J, Yu XF. Impact of Upstream Weaving Segment on Signalized Intersection Capacity. *Intelligent Computation Technology and Automation ICICTA 2008*; Changsha, China: IEEE; 2008. p. 377–82.
18. Darbha S, Rajagopal KR. Intelligent cruise control systems and traffic flow stability. *Transportation Research Part C: Emerging Technologies*. 1999; 7(6): 329–52.
19. Yu SW, Shi ZK. Dynamics of connected cruise control systems considering velocity changes with memory feedback. *Measurement*. 2015; 64: 34–48.
20. Yu SW, Shi ZK. The effects of vehicular gap changes with memory on traffic flow in cooperative adaptive cruise control strategy. *Physica A: Statistical Mechanics And Its Applications*. 2015; 428: 206–23.
21. Li PY, Shrivastava A. Traffic flow stability induced by constant time headway policy for adaptive cruise control vehicles. *Transportation Research Part C: Emerging Technologies*. 2002; 10(4): 275–301.
22. Hu HJ, Williams BM, Roupail NM, Khattak AJ, Zhou XS. Modeling the Role of Transportation Information in Mitigating Major Capacity Reductions in a Regional Network. *Transportation Research Record*. 2009; (2138): 75–84.
23. Lindsey R, Daniel T, Gisches E, Rapoport A. Pre-trip information and route-choice decisions with stochastic travel conditions: Theory. *Transportation Research Part B-Methodological*. 2014; 67: 187–207.
24. Sun HJ, Wu JJ, Wang W, Gao ZY. Reliability-based traffic network design with advanced traveler information systems. *Information Sciences*. 2014; 287: 121–30.
25. Aghdashi S, Schroeder BJ, Roupail NM. Method for Scenario Selection and Probability Adjustment for Reliability and Active Traffic Management Analysis in a Highway Capacity Manual Context. *Transportation Research Record*. 2014; (2461): 58–65.
26. Karoonsoontawong A, Lin DY. Time-Varying Lane-Based Capacity Reversibility for Traffic Management. *Computer-Aided Civil And Infrastructure Engineering*. 2011; 26(8): 632–46.
27. Tang TQ, Yu Q, Yang SC, Ding C. Impacts of the vehicle's fuel consumption and exhaust emissions on the trip cost allowing late arrival under car-following model. *Physica A: Statistical Mechanics And Its Applications*. 2015; 431: 52–62.
28. Tang TQ, Wang YP, Yang XB, Huang HJ. A Multilane Traffic Flow Model Accounting for Lane Width, Lane-Changing and the Number of Lanes. *Networks & Spatial Economics*. 2014; 14(3–4): 465–83.
29. Gupta AK, Katiyar VK. Phase transition of traffic states with on-ramp. *Physica A: Statistical Mechanics And Its Applications*. 2006; 371(2): 674–82.
30. Gupta AK, Katiyar VK. A new anisotropic continuum model for traffic flow. *Physica A: Statistical Mechanics and its Applications*. 2006; 368(2): 551–9.
31. Gupta AK, Katiyar VK. Analyses of shock waves and jams in traffic flow. *Journal of Physics A: Mathematical and General*. 2005; 38(19): 4069–83.
32. Gupta AK, Sharma S. Nonlinear analysis of traffic jams in an anisotropic continuum model. *Chinese Physics B*. 2010; 19(11).
33. Gupta AK, Dhiman I. Analyses of a continuum traffic flow model for a nonlane-based system. *International Journal of Modern Physics C*. 2014; 25(10): 1450045.
34. Tang TQ, Shi WF, Shang HY, Wang YP. A new car-following model with consideration of inter-vehicle communication. *Nonlinear Dynamics*. 2014; 76(4): 2017–23.
35. Tang TQ, Shi WF, Shang HY, Wang YP. An extended car-following model with consideration of the reliability of inter-vehicle communication. *Measurement*. 2014; 58: 286–93.
36. Tang TQ, Chen L, Yang SC, Shang HY. An extended car-following model with consideration of the electric vehicle's driving range. *Physica A: Statistical Mechanics And Its Applications*. 2015; 430: 148–55.
37. Peng G. A new lattice model of the traffic flow with the consideration of the driver anticipation effect in a two-lane system. *Nonlinear Dynamics*. 2013; 73(1–2): 1035–43.
38. Peng G. A new lattice model of traffic flow with the consideration of individual difference of anticipation driving behavior. *Communications In Nonlinear Science And Numerical Simulation*. 2013; 18(10): 2801–6.
39. Peng G. A new lattice model of two-lane traffic flow with the consideration of optimal current difference. *Communications In Nonlinear Science And Numerical Simulation*. 2013; 18(3): 559–66.
40. Peng G-h, Cheng R-j. A new car-following model with the consideration of anticipation optimal velocity. *Physica A: Statistical Mechanics And Its Applications*. 2013; 392(17): 3563–9.
41. Tang TQ, Xu KW, Yang SC, Shang HY. Influences of battery exchange on the vehicle's driving behavior and running time under car-following model. *Measurement*. 2015; 59: 30–7.

42. Tang TQ, Chen L, Wu YH, Caccetta L. A macro traffic flow model accounting for real-time traffic state. *Physica A: Statistical Mechanics And Its Applications*. 2015; 437: 55–67.
43. Tang TQ, Li JG, Yang SC, Shang HY. Effects of on-ramp on the fuel consumption of the vehicles on the main road under car-following model. *Physica A: Statistical Mechanics And Its Applications*. 2015; 419: 293–300.
44. Tang TQ, Huang HJ, Wu WX, Wu YH. Analyzing trip cost with no late arrival under car-following model. *Measurement*. 2015; 64: 123–9.
45. Zhao J, Ma W, Liu Y, Yang X. Integrated design and operation of urban arterials with reversible lanes. *Transportmetrica B-Transport Dynamics*. 2014; 2(2): 130–50.
46. Williams KM, Stover VG, Dixon KK, Demosthenes P. *Access Management Manual*. Washington, DC, USA: Transportation Research Board; 2014.
47. Zhao J, Ma W, Head KL, Yang X. Optimal Intersection Operation with Median U-Turn Lane-Based Approach. *Transportation Research Record: Journal of the Transportation Research Board*. 2014; 2439: 71–82.
48. AASHTO. *A Policy on Geometric Design of Highways and Streets*. 6th Edition ed. Washington, DC: American Association of State Highway and Transportation Officials (AASHTO); 2011.
49. Bonneson JA, McCoy PT. *Capacity and Operational Effects of Midblock Left-turn Lanes*. Washington, DC, USA: Transportation Research Board, 1997.
50. O'shea JK, Machemehl YB, Rioux TW. *Design Guidelines for Provision of Median Access on Principal Arterials*. Austin, TX, USA: Texas Department of Transportation Research and Technology Implementation Office, 2000.
51. Courage KG, Fambro DB, Akcelik R, Lin PS, Anwar M, Vilorio F. *Capacity Analysis of Traffic-Actuated Intersections*. Washington, DC, USA: Transportation Research Board, 1996.
52. Wu N. An Approximation for the Distribution of Queue Lengths at Unsignalized Intersections. *Proceedings of the Second International Symposium on Highway Capacity*; Sydney, Australia: Australian Road Research Board; 1994. p. 1–20.
53. Zhao J, Liu Y, Yang X. Operation of signalized diamond interchanges with frontage roads using dynamic reversible lane control. *Transportation Research Part C: Emerging Technologies*. 2015; 51: 196–209.
54. FHWA. *Revised Monograph on Traffic Flow Theory*. Washington, DC, USA: Federal Highway Administration; 2012. Available: <http://www.fhwa.dot.gov/publications/research/operations/tft/>. Accessed 2015 Aug 1.
55. Sharma S. Effect of driver's anticipation in a new two-lane lattice model with the consideration of optimal current difference. *Nonlinear Dynamics*. 2015; 81(1–2): 991–1003.
56. Sharma S. Lattice hydrodynamic modeling of two-lane traffic flow with timid and aggressive driving behavior. *Physica A: Statistical Mechanics And Its Applications*. 2015; 421: 401–11.
57. Gupta AK, Redhu P. Analyses of the driver's anticipation effect in a new lattice hydrodynamic traffic flow model with passing. *Nonlinear Dynamics*. 2014; 76(2): 1001–11.
58. Zhao J, Yun M, Zhang HM, Yang X. Driving simulator evaluation of drivers' response to intersections with dynamic use of exit-lanes for left-turn. *Accident; analysis and prevention*. 2015; 81: 107–19. doi: [10.1016/j.aap.2015.04.028](https://doi.org/10.1016/j.aap.2015.04.028) PMID: [25969158](https://pubmed.ncbi.nlm.nih.gov/25969158/)
59. Redhu P, Gupta AK. Jamming transitions and the effect of interruption probability in a lattice traffic flow model with passing. *Physica A: Statistical Mechanics And Its Applications*. 2015; 421: 249–60.
60. Redhu P, Gupta AK. Delayed-feedback control in a Lattice hydrodynamic model. *Communications In Nonlinear Science And Numerical Simulation*. 2015; 27(1–3): 263–70.
